# Supplementary material
Source: PubMed Central journal article supplement (PMC6708260)
Supplement: Supp_Table1.pdf [file Supp_Table1.pdf]

## Supplementary Data

SUPPLEMENTARY TABLE S1. EXCLUSION DEMOGRAPHICS

|                      | <i>Included</i>     | <i>Excluded</i>      |
|----------------------|---------------------|----------------------|
| Total                | 2662<br>% (95% CI)  | 12,527<br>% (95% CI) |
| Sex                  |                     |                      |
| Female               | 47.91 (45.94–49.87) | 51.26 (50.08–52.45)  |
| Male                 | 52.09 (50.13–54.06) | 48.74 (47.55–49.92)  |
| Race/ethnicity       |                     |                      |
| Hispanic             | 18.77 (16.01–21.54) | 18.17 (15.67–20.65)  |
| White                | 67.99 (64.71–71.27) | 56.94 (53.59–60.28)  |
| Black                | 13.24 (11.33–15.14) | 12.90 (11.15–14.64)  |
| Other                | —                   | 12.00 (10.54–13.46)  |
| Income:poverty ratio |                     |                      |
| 3.0–4.0              | 43.27 (40.42–46.11) | 41.67 (39.09–44.25)  |
| 1.0–3.0              | 38.38 (35.91–41.45) | 38.09 (36.09–40.09)  |
| <1.0                 | 18.05 (16.19–19.92) | 20.24 (18.31 (22.17) |
| Education            |                     |                      |
| No HS diploma        | 14.39 (12.53–16.25) | 13.92 (12.60–15.24)  |
| HS diploma           | 19.42 (17.13–21.70) | 18.94 (17.44–20.45)  |
| >HS diploma          | 66.20 (63.15–69.24) | 67.13 (65.07–69.20)  |
| Food security status |                     |                      |
| Food insecure        | 17.25 (15.47–19.04) | 17.32 (16.04–18.61)  |

There were 15,189 NHANES participants aged 20–39 from 2003 to 2014. In total, 2662 were included in the final sample for analysis; 12,527 total were excluded for various criteria: pregnant at the time of examination (1393), taking antidiabetic medication (284), nonfasting status (368), incomplete data regarding MetS (9530), incomplete household income data (1157), incomplete education data (439), and incomplete food security assessment (3819).

CI, confidence interval.
